# Supplementary material for: Single-cell resolved ploidy and chromosomal aberrations in nonalcoholic steatohepatitis-(NASH) induced hepatocellular carcinoma and its precursor lesions
Source: PubMed Central journal article supplement (PMC9805444; doi:10.1038/s41598-022-27173-z), 2022-12-31
Supplement: 41598_2022_27173_MOESM1_ESM.pdf [file 41598_2022_27173_MOESM1_ESM.pdf]

## **Supplemental material to:**

### **Single-Cell resolved Ploidy and Chromosomal Aberrations in Nonalcoholic Steatohepatitis-(NASH) Induced Hepatocellular Carcinoma and its Precursor Lesions.**

**Juliane Friemel, Irianna Torres, Elizabeth Brauneis, Tim Thörner, Alejandro A. Schäffer, E. Michael Gertz, Tobias Grob , Kati Seidl , Achim Weber, Thomas Ried, Kerstin Heselmeyer-Haddad**

#### **Legends:**

**Supplementary Figure 1** (A-C) Color display of miFISH analysis with eight gene-specific probes and gallery view showing a case with *HER2* amplifikation. Chart: Green, gains; red, losses; blue, unchanged. **(A)** Detail from left to right: the „locus“ column shows the chromosome arm. Average ploidy (center) and percentages of tumor clones (top left to right) are grouped into diploid, tetraploid and octoploid tumor clones. **(B)** *HER2* signals varied between 4-6 copies/cell, and 8-11 copies in tetraploid cells. Additional *MYC* gains and *TP53* loss. **(C)** Immunohistochemistry staining for *HER2* showed no specific membranous staining.

**Supplementary Figure 2** Original FISH tree of case 1. The string of numbers represent the copy numbers of genes as follows: *FHIT-TERT-MET-MYC-CCND1-WWOX-TP53-HER2*. Size of ovals represents respective clone frequency. Root is a normal diploid clone.

**Supplementary Figure 3** Color display of miFISH analysis of all cases that are not shown in Figure 2 and 3. Green, gains; red, losses; blue, unchanged. Detail from left to right: the „locus“ column shows the chromosome arm. Average ploidy (center) and percentages of tumor clones. Instability index: signal patterns/100 nuclei.

A

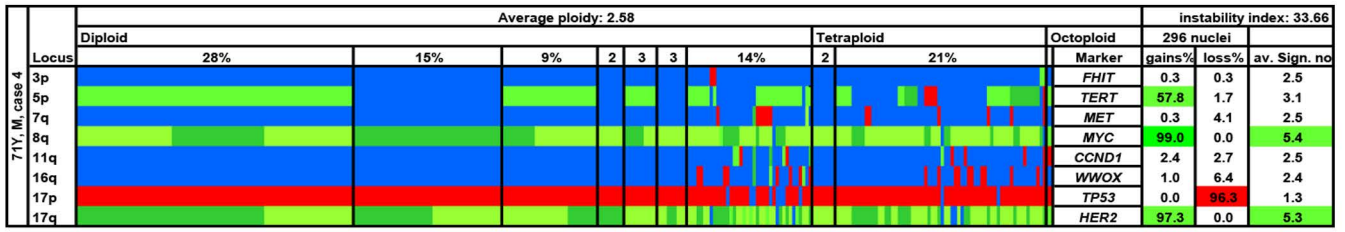

HER2 gain, TP53 loss MYC gain

B

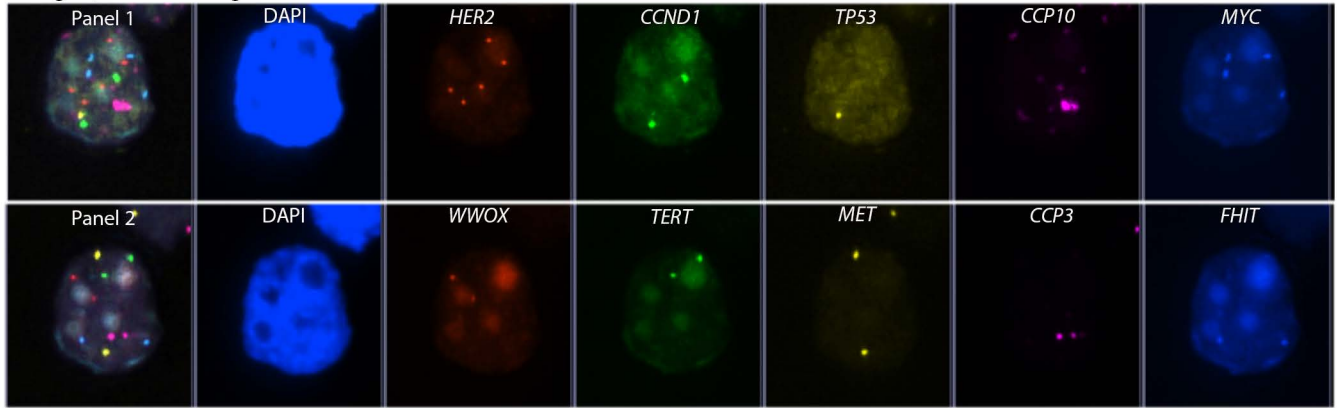

C

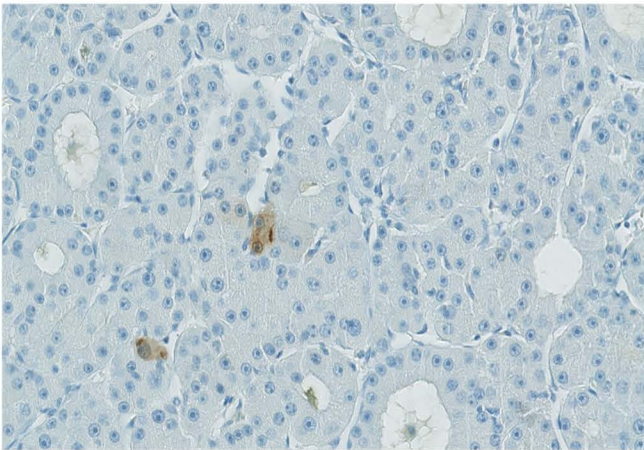

Supplementary Figure 2

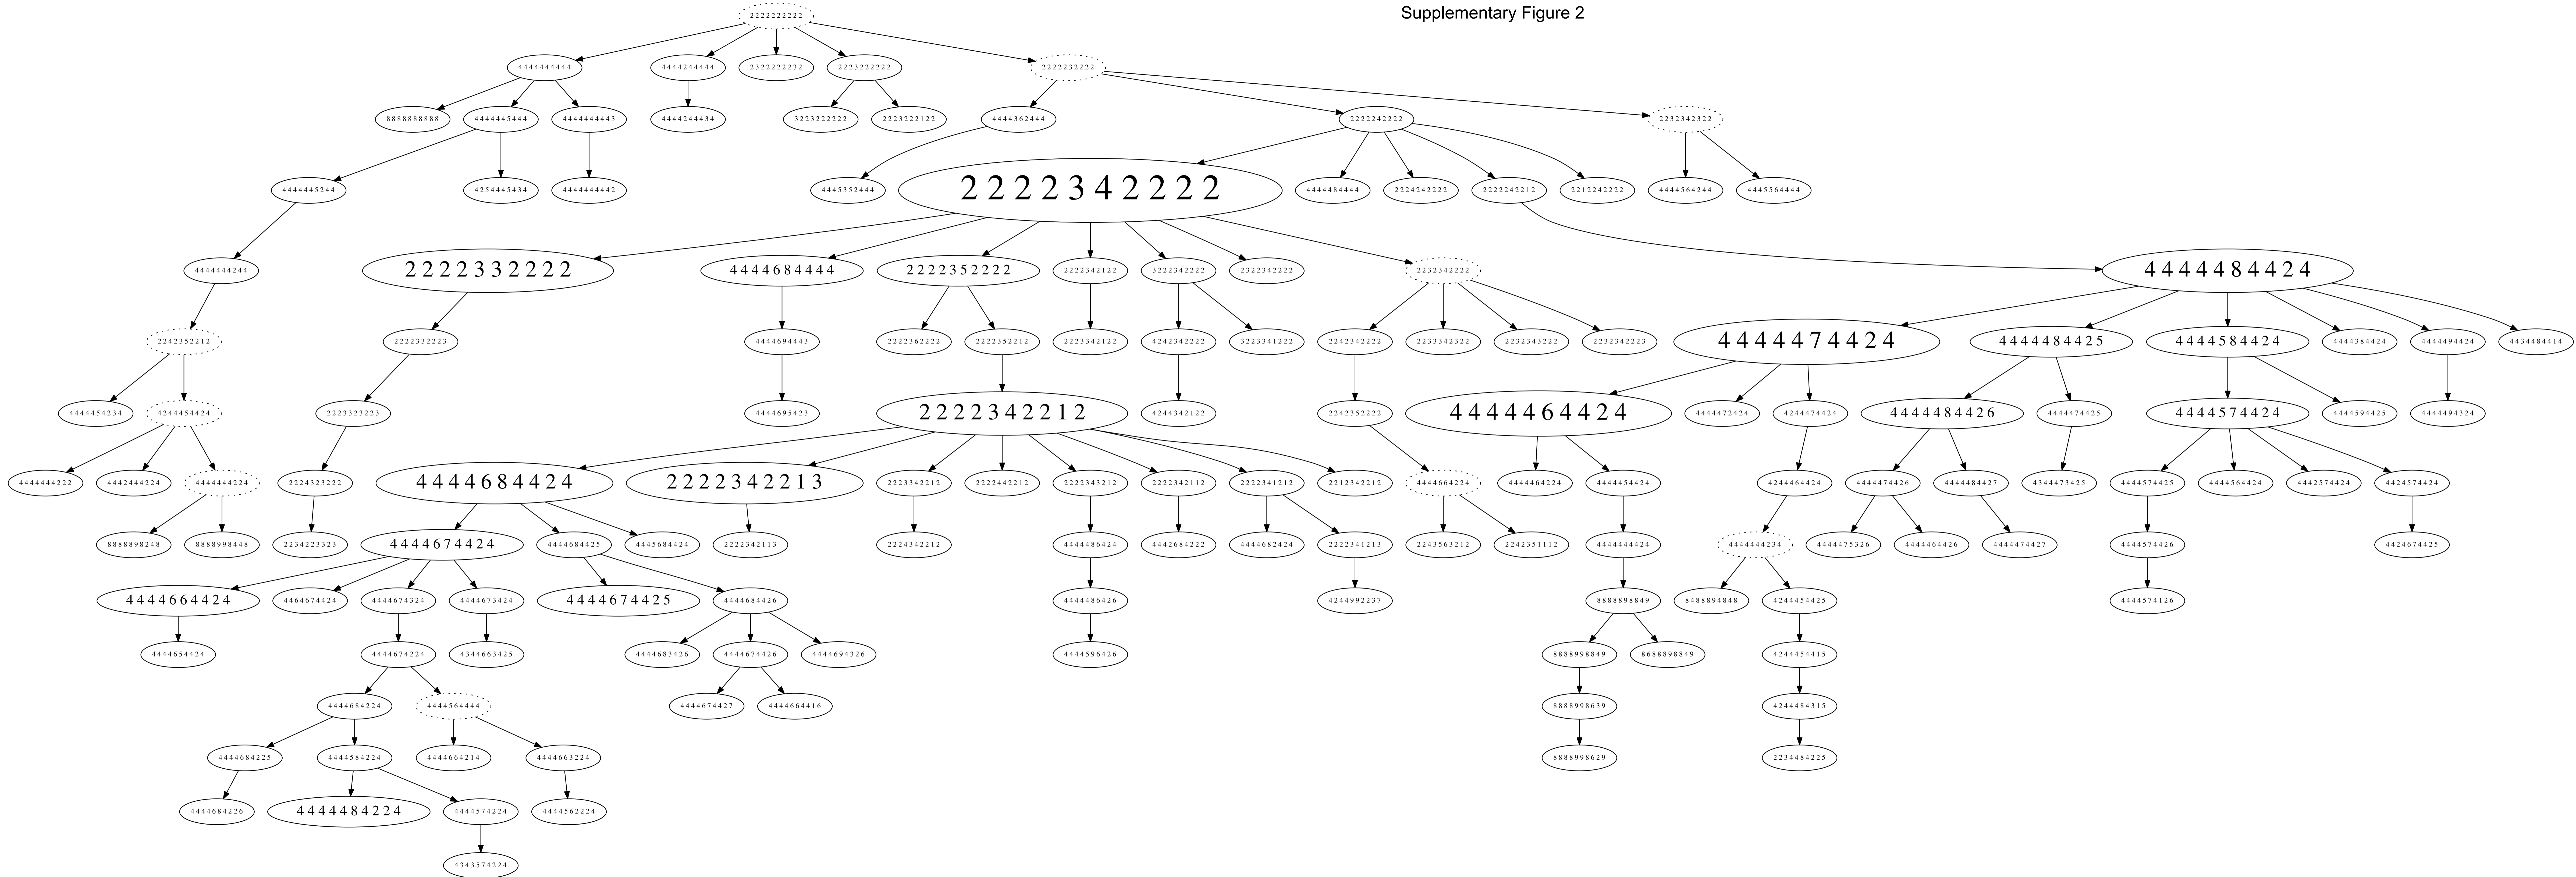

|                |                | Average ploidy: 4.05 |  |  |     |    |    |    |     |  |      | Instability index: 26.17 |         |           |     |
|----------------|----------------|----------------------|--|--|-----|----|----|----|-----|--|------|--------------------------|---------|-----------|-----|
| Locus          | Dip Tetraploid |                      |  |  |     |    |    |    |     |  | gene | 298 nuclei               |         | av.Sig.no |     |
|                | 4%             | 32%                  |  |  | 33% | 5% | 5% | 4% | 32% |  |      | gains%                   | losses% |           |     |
| 69Y, M, case 2 | 3p             |                      |  |  |     |    |    |    |     |  |      | FHIT                     | 10      | 2         | 4.1 |
|                | 5p             |                      |  |  |     |    |    |    |     |  |      | TERT                     | 0       | 14        | 3.8 |
|                | 7q             |                      |  |  |     |    |    |    |     |  |      | MET                      | 6       | 10        | 3.9 |
|                | 8q             |                      |  |  |     |    |    |    |     |  |      | MYC                      | 3       | 5         | 3.9 |
|                | 11q            |                      |  |  |     |    |    |    |     |  |      | CCND1                    | 1       | 3         | 3.9 |
|                | 16q            |                      |  |  |     |    |    |    |     |  |      | WWOX                     | 0       | 93        | 2.1 |
|                | 17p            |                      |  |  |     |    |    |    |     |  |      | TP53                     | 0       | 99        | 2.0 |
|                | 17q            |                      |  |  |     |    |    |    |     |  |      | HER2                     | 0       | 74        | 3.1 |

|               |         | Average ploidy: 2.38 |    |    |    |   |   |     |  |  |      | Instability index: 36.4 |        |           |         |
|---------------|---------|----------------------|----|----|----|---|---|-----|--|--|------|-------------------------|--------|-----------|---------|
| Locus         | Diploid |                      |    |    |    |   |   |     |  |  | gene | 250 nuclei              |        | av.Sig.no |         |
|               | 14%     | 12%                  | 8% | 7% | 5% | 4 | 3 | 32% |  |  |      | 14%                     | gains% |           | losses% |
| 74, M, case 3 | 3p      |                      |    |    |    |   |   |     |  |  |      | FHIT                    | 3      | 8         | 2.5     |
|               | 5p      |                      |    |    |    |   |   |     |  |  |      | TERT                    | 16     | 4         | 2.9     |
|               | 7q      |                      |    |    |    |   |   |     |  |  |      | MET                     | 3      | 6         | 2.5     |
|               | 8q      |                      |    |    |    |   |   |     |  |  |      | MYC                     | 7      | 11        | 2.7     |
|               | 11q     |                      |    |    |    |   |   |     |  |  |      | CCND1                   | 13     | 3         | 2.7     |
|               | 16q     |                      |    |    |    |   |   |     |  |  |      | WWOX                    | 44     | 3         | 2.3     |
|               | 17p     |                      |    |    |    |   |   |     |  |  |      | TP53                    | 2      | 26        | 2.3     |
|               | 17q     |                      |    |    |    |   |   |     |  |  |      | HER2                    | 26     | 24        | 2.8     |

|               |         | Average ploidy: 2.38 |    |    |    |   |   |     |  |  |      | Instability index: 36.4 |        |           |         |
|---------------|---------|----------------------|----|----|----|---|---|-----|--|--|------|-------------------------|--------|-----------|---------|
| Locus         | Diploid |                      |    |    |    |   |   |     |  |  | Gene | 250 nuclei              |        | av.Sig.no |         |
|               | 14%     | 12%                  | 8% | 7% | 5% | 4 | 3 | 32% |  |  |      | 14%                     | gains% |           | losses% |
| 74, M, case 3 | 3p      |                      |    |    |    |   |   |     |  |  |      | FHIT                    | 3.2    | 7.6       | 2.5     |
|               | 5p      |                      |    |    |    |   |   |     |  |  |      | TERT                    | 16     | 3.6       | 2.9     |
|               | 7q      |                      |    |    |    |   |   |     |  |  |      | MET                     | 2.8    | 6         | 2.5     |
|               | 8q      |                      |    |    |    |   |   |     |  |  |      | MYC                     | 7.2    | 11        | 2.7     |
|               | 11q     |                      |    |    |    |   |   |     |  |  |      | CCND1                   | 13.2   | 3.2       | 2.7     |
|               | 16q     |                      |    |    |    |   |   |     |  |  |      | WWOX                    | 44     | 3.2       | 2.3     |
|               | 17p     |                      |    |    |    |   |   |     |  |  |      | TP53                    | 2      | 26        | 2.3     |
|               | 17q     |                      |    |    |    |   |   |     |  |  |      | HER2                    | 26     | 24        | 2.8     |

|                |         | Average ploidy: 2.07 |  |  |    |    |   |   |   |   |      | instability index: 19.11 |    |            |     |
|----------------|---------|----------------------|--|--|----|----|---|---|---|---|------|--------------------------|----|------------|-----|
| Locus          | Diploid |                      |  |  |    |    |   |   |   |   | gene | 293 nuclei               |    | av. Sig.no |     |
|                | 33%     | 17%                  |  |  | 5% | 4% | 3 | 3 | 3 | 2 |      | 2                        | 2  |            | 23% |
| 60Y, M, case 7 | 3p      |                      |  |  |    |    |   |   |   |   |      | FHIT                     | 0  | 0          | 2.1 |
|                | 5p      |                      |  |  |    |    |   |   |   |   |      | TERT                     | 91 | 0          | 3.8 |
|                | 7q      |                      |  |  |    |    |   |   |   |   |      | MET                      | 78 | 1          | 3.0 |
|                | 8q      |                      |  |  |    |    |   |   |   |   |      | MYC                      | 1  | 1          | 2.0 |
|                | 11q     |                      |  |  |    |    |   |   |   |   |      | CCND1                    | 17 | 1          | 2.2 |
|                | 16q     |                      |  |  |    |    |   |   |   |   |      | WWOX                     | 0  | 35         | 1.8 |
|                | 17p     |                      |  |  |    |    |   |   |   |   |      | TP53                     | 0  | 84         | 1.5 |
|                | 17q     |                      |  |  |    |    |   |   |   |   |      | HER2                     | 13 | 2          | 2.2 |

|                |         | Average ploidy: 3.17 |    |    |   |   |   |   |   |   |      | Instability index: 24.08 |     |           |     |   |     |
|----------------|---------|----------------------|----|----|---|---|---|---|---|---|------|--------------------------|-----|-----------|-----|---|-----|
| Locus          | Diploid |                      |    |    |   |   |   |   |   |   | gene | 191 nuclei               |     | av. Sign. |     |   |     |
|                | 25%     | 10%                  | 6% | 4% | 4 | 4 | 3 | 3 | 3 | 2 |      | 2                        | 11% |           | 7%  | 4 | 13% |
| 64Y, F, case 9 | 3p      |                      |    |    |   |   |   |   |   |   |      | FHIT                     | 0   | 1         | 2.9 |   |     |
|                | 5p      |                      |    |    |   |   |   |   |   |   |      | TERT                     | 23  | 1         | 3.2 |   |     |
|                | 7q      |                      |    |    |   |   |   |   |   |   |      | MET                      | 3   | 6         | 3.1 |   |     |
|                | 8q      |                      |    |    |   |   |   |   |   |   |      | MYC                      | 0   | 26        | 2.8 |   |     |
|                | 11q     |                      |    |    |   |   |   |   |   |   |      | CCND1                    | 12  | 2         | 3.1 |   |     |
|                | 16q     |                      |    |    |   |   |   |   |   |   |      | WWOX                     | 1   | 6         | 3.0 |   |     |
|                | 17p     |                      |    |    |   |   |   |   |   |   |      | TP53                     | 0   | 71        | 2.4 |   |     |
|                | 17q     |                      |    |    |   |   |   |   |   |   |      | HER2                     | 0   | 1         | 2.8 |   |     |

|                 |         | Average ploidy: 2.23 |  |  |  |  |  |  |  |  |      | Instability index: 6.55 |   |             |     |
|-----------------|---------|----------------------|--|--|--|--|--|--|--|--|------|-------------------------|---|-------------|-----|
| Locus           | Diploid |                      |  |  |  |  |  |  |  |  | gene | 290 nuclei              |   | av. Sig. no |     |
|                 | 79%     |                      |  |  |  |  |  |  |  |  |      | 3                       | 3 |             | 7%  |
| 62Y, M, case 10 | 3p      |                      |  |  |  |  |  |  |  |  |      | FHIT                    | 0 | 1           | 2.1 |
|                 | 5p      |                      |  |  |  |  |  |  |  |  |      | TERT                    | 1 | 3           | 2.1 |
|                 | 7q      |                      |  |  |  |  |  |  |  |  |      | MET                     | 0 | 4           | 2.1 |
|                 | 8q      |                      |  |  |  |  |  |  |  |  |      | MYC                     | 1 | 2           | 2.1 |
|                 | 11q     |                      |  |  |  |  |  |  |  |  |      | CCND1                   | 1 | 1           | 2.1 |
|                 | 16q     |                      |  |  |  |  |  |  |  |  |      | WWOX                    | 0 | 3           | 2.1 |
|                 | 17p     |                      |  |  |  |  |  |  |  |  |      | TP53                    | 0 | 99          | 1.1 |
|                 | 17q     |                      |  |  |  |  |  |  |  |  |      | HER2                    | 0 | 0           | 2.1 |

|                 |         | Average Ploidy: 2.08 |  |  |  |  |  |  |  |  |      | Instability Index: 14.2 |       |        |        |
|-----------------|---------|----------------------|--|--|--|--|--|--|--|--|------|-------------------------|-------|--------|--------|
| Locus           | Diploid |                      |  |  |  |  |  |  |  |  | gene | 300 nuclei              |       | AvgSig |        |
|                 | 70.0%   |                      |  |  |  |  |  |  |  |  |      | 13.3%                   | 14.0% |        | gains% |
| 54Y, M, case 11 | 3p      |                      |  |  |  |  |  |  |  |  |      | FHIT                    | 1%    | 2%     | 2.1    |
|                 | 5p      |                      |  |  |  |  |  |  |  |  |      | TERT                    | 2%    | 3%     | 2.1    |
|                 | 7q      |                      |  |  |  |  |  |  |  |  |      | MET                     | 82%   | 0%     | 2.9    |
|                 | 8q      |                      |  |  |  |  |  |  |  |  |      | MYC                     | 1%    | 2%     | 2.1    |
|                 | 11q     |                      |  |  |  |  |  |  |  |  |      | CCND1                   | 99%   | 0%     | 9.4    |
|                 | 16q     |                      |  |  |  |  |  |  |  |  |      | WWOX                    | 0%    | 1%     | 2.1    |
|                 | 17p     |                      |  |  |  |  |  |  |  |  |      | TP53                    | 0%    | 96%    | 1.1    |
|                 | 17q     |                      |  |  |  |  |  |  |  |  |      | HER2                    | 2%    | 1%     | 2.1    |
